# Supplementary material for: C,N co-doped porous TiO2hollow sphere visible light photocatalysts for efficient removal of highly toxic phenolic pollutants
Source: Royal Society of Chemistry journal article supplement (doi:10.1039/c8dt00262b), 2018-01-01
Supplement: c8dt00262b1.pdf [file c8dt00262b1.pdf]

## Supplementary Information

# C, N co-doped Porous TiO<sub>2</sub> Hollow Spheres Visible Light Photocatalysts for Efficient Removal of High-Toxic Phenolic Pollutants

Jiaqi Zhang<sup>a</sup>, Zipeng Xing<sup>a,\*</sup>, Jiayi Cui<sup>a</sup>, Zhenzi Li<sup>b</sup>, Siyu Tan<sup>a</sup>, Jinlong Zou<sup>a</sup>, Qi Zhu<sup>a,\*</sup>, Wei Zhou<sup>a,\*</sup>

<sup>a</sup> Department of Environmental Science, School of Chemistry and Materials Science, Key Laboratory of Functional Inorganic Material Chemistry, Ministry of Education of the People's Republic of China, Heilongjiang University, Harbin 150080, P. R. China,

Tel: +86-451-8660-8616, Fax: +86-451-8660-8240,

Email: xingzipeng@hlju.edu.cn; hdzhuqi@126.com; zwchem@hotmail.com

<sup>b</sup> Department of Epidemiology and Biostatistics, Harbin Medical University, Harbin 150086, P. R. China

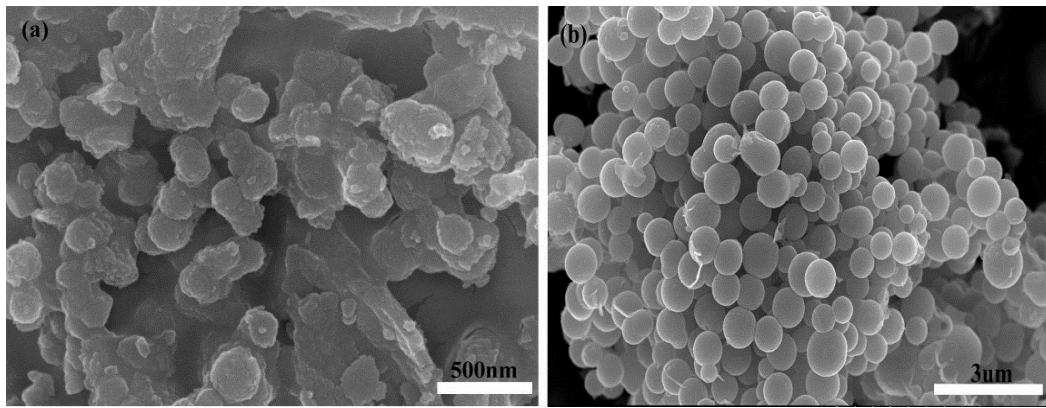

**Figure S1.** The SEM images of fabrication  $\text{TiO}_2$  hollow spheres (a) using excessive amounts of the soft template, (b) using suitable amounts of the soft template.

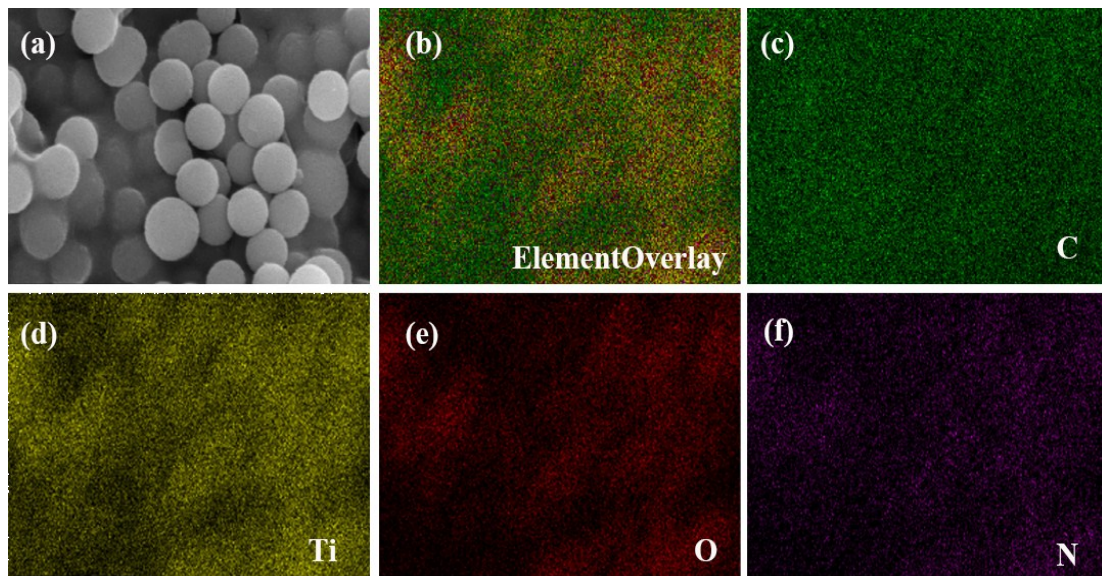

**Figure S2.** The SEM image and the corresponding EDX mapping of HPT 550 for different elements.

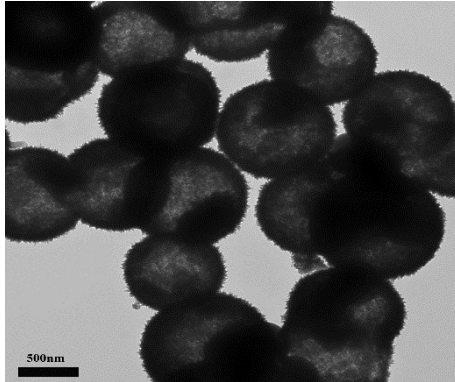

**Figure S3.** The TEM image of HPT 550.

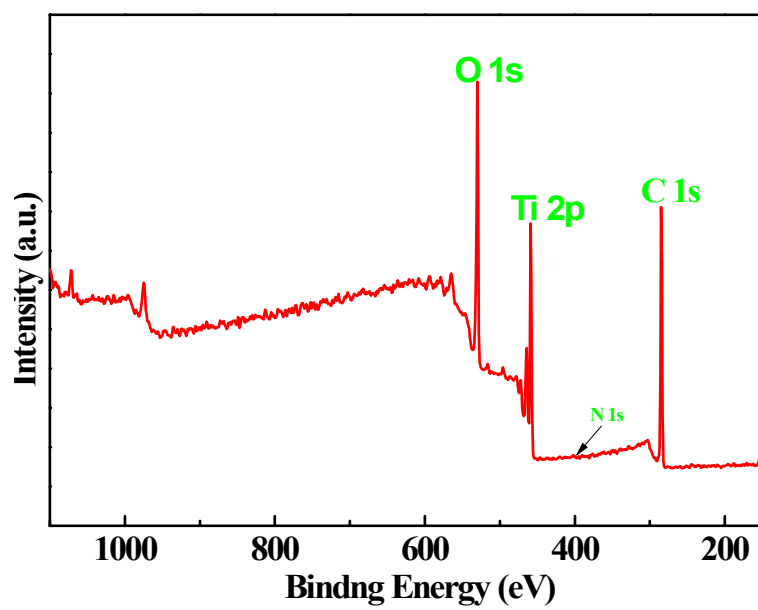

**Figure S4.** The full-scale XPS spectrum of HPT 550.

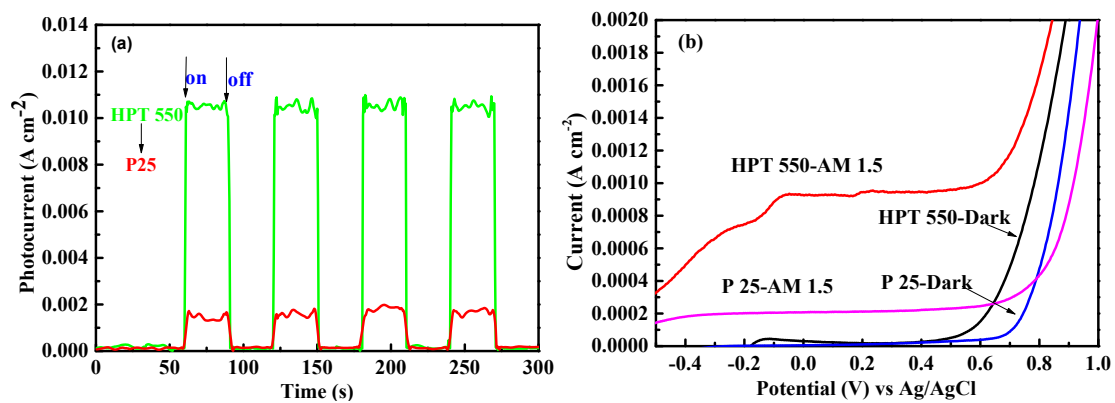

**Figure S5.** The transient photocurrent response (I-T curve) (a) and Linear sweep voltammograms (LSV) in the dark and under AM 1.5 of HPT 550 and P25, respectively.

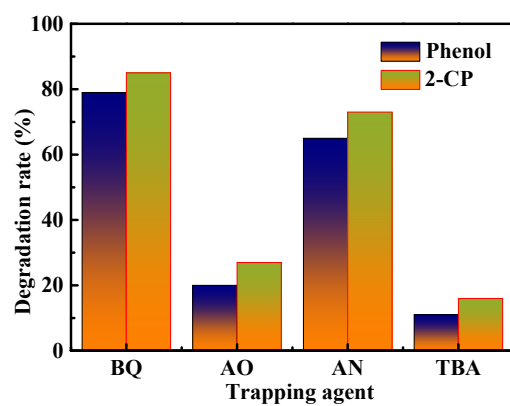

**Figure. S6** Comparison of the photocatalytic performance of HPT 550 for the degradation of phenol and 2-CP with adding TBA, BQ, AN and AO under visible light irradiation.
